# Supplementary material for: Improvement of Osteoporosis Screening among Inflammatory Bowel Disease Patients at Gastroenterology Fellows’ Clinics
Source: Hindawi journal article supplement (doi:10.1155/2020/7128932), 2020-06-19
Supplement: f1 [file 7128932.f1.zip]

## Intro

- Patients with IBD often consider their gastroenterologist to be their primary care provider.
- Therefore, it is becoming increasingly important that preventive care and healthcare maintenance issues be co-managed by both the gastroenterologist and primary care team.
- This includes appropriate vaccinations, screening for depression and anxiety, melanoma screening, and screening for osteoporosis- the main emphasis of our quality improvement project.

## Some risk factors for osteoporosis: full list more extensive...

2364

Osteoporos Int (2014) 25:2359-2

**Table 1** Conditions, diseases, and medications that cause or contribute to osteoporosis and fractures

### Lifestyle factors

Alcohol abuse  
Frequent falling  
Inadequate physical activity  
Vitamin D insufficiency

Excessive thinness  
High salt intake  
Low calcium intake

Excess vitamin A  
Immobilization  
Smoking (active or passive)

### Genetic diseases

Cystic fibrosis  
Glycogen storage diseases  
Hypophosphatasia  
Osteogenesis imperfecta  
Riley-Day syndrome

Ehlers-Danlos  
Hemochromatosis  
Marfan syndrome  
Parental history of hip fracture

Gaucher's disease  
Homocystinuria  
Menkes steely hair syndrome  
Porphyria

### Hypogonadal states

Androgen insensitivity  
Hyperprolactinemia  
Turner's and Klinefelter's syndromes

Anorexia nervosa  
Panhypopituitarism

Athletic amenorrhea  
Premature menopause (<40 years)

### Endocrine disorders

Central obesity  
Hyperparathyroidism

Cushing's syndrome  
Thyrotoxicosis

Diabetes mellitus (types 1 and 2)

### Gastrointestinal disorders

Celiac disease  
Inflammatory bowel disease  
Primary biliary cirrhosis

Gastric bypass  
Malabsorption

Gastrointestinal surgery  
Pancreatic disease

## ACG 2017 Clinical Guideline: Preventive Care in Inflammatory Bowel Disease

- Patients who have IBD should be screened based on established guidelines for the general population. Osteoporosis screening guidelines differ between societies, however, DEXA testing is recommended by the National Osteoporosis Foundation for postmenopausal women aged 65 and men aged 70 and older

- BMD measurement (with a DEXA scan) is recommended ... specifically in those who have used oral corticosteroid therapy for longer than 3 consecutive months in a dose  $\geq 7.5$  mg/day of prednisone-equivalent in the absence of baseline BMD measurement

Am J Gastroenterol. 2017 Feb;112(2):241-258.

## Indications for osteoporosis screening in our project based on combination of 3 guidelines

1. Female age 65 years old and older
2. Men age 70 years old and older
3. Patients who have used oral corticosteroid therapy for longer than 3 consecutive months in a dose  $\geq 7.5$  mg/day of prednisone-equivalent in the absence of baseline BMD measurements
4. Previous bone fracture in adult life occurring spontaneously, or a fracture arising from trauma which, in a healthy individual, would not have resulted in a fracture) including vertebral and hip fractures
