# Supplementary material for: Improvement of Osteoporosis Screening among Inflammatory Bowel Disease Patients at Gastroenterology Fellows’ Clinics
Source: Hindawi journal article supplement (doi:10.1155/2020/7128932), 2020-06-19
Supplement: f1 [file 7128932.f1.zip]

## Clinic Template

---

1. Does the patient have IBD? YES or NO

***If patient has IBD complete the next questions, otherwise delete the text below.***

2. If IBD, is it Crohn's or is it UC? ---

3. Does the patient meet criteria for DEXA scan ?

- Age criteria? YES or NO
- Steroids? YES or NO
- Fracture? YES or NO

4. Is there a DEXA scan done in past 2 years? YES or NO

5. If meets criteria and no DEXA in system, please order test if appropriate
