# Supplementary material for: Improvement of Osteoporosis Screening among Inflammatory Bowel Disease Patients at Gastroenterology Fellows' Clinics
Source: Adv Prev Med. 2020 Jun 19;2020:7128932. doi: 10.1155/2020/7128932 (PMC7321501; doi:10.1155/2020/7128932)
Supplement: Supplementary Materials — Appendix A: sample material from the didactic presentations and handouts that were used for educating the fellows. Appendix B: standardized clinic template that was incorporated into the fellows' electronic clinic notes, as part of the quality initiative intervention. [file 7128932.f1.zip]

Archive with 2 entries (2 files):
- 7128932.f1/Appendix A.pdf
- 7128932.f1/Appendix B.pdf
